# Supplementary material
Source: publisher site journal article supplement (https://www.kjim.org/upload/media/kjim-2025-052-Supplementary-Table-3.pdf)
Supplement: Supplementary file 1 [file kjim-2025-052-Supplementary-Table-3.pdf]

**Supplementary Table 3. Number of events and HR of primary and secondary outcome according to DOAC dose**

| Clinical outcomes            | Regular dose<br>(n = 28) | Low dose<br>(n = 104) | Unadjusted HR<br>(95% CI) <sup>a)</sup> | p value |
|------------------------------|--------------------------|-----------------------|-----------------------------------------|---------|
| Stroke and systemic embolism | 1 (3.6)                  | 3 (2.9)               | 0.66 (0.07–6.42)                        | 0.724   |
| Major bleeding               | 4 (14.3)                 | 13 (12.5)             | 0.75 (0.24–2.30)                        | 0.613   |
| Intracranial hemorrhage      | 3 (10.7)                 | 3 (2.9)               | 0.19 (0.04–0.96)                        | 0.044   |
| Gastrointestinal bleeding    | 1 (3.6)                  | 10 (9.6)              | 2.41 (0.31–18.90)                       | 0.402   |
| All-cause of death           | 3 (10.7)                 | 6 (5.8)               | 0.49 (0.12–2.00)                        | 0.317   |

HR, hazard ratio; DOAC, direct oral anticoagulant; CI, confidence interval.

<sup>a)</sup>Reference: regular dose.

The incidence rate is presented as the number of total events (events/1,000 patients\*years).
